# Supplementary material for: Phenotype and animal domestication: A study of dental variation between domestic, wild, captive, hybrid and insular Sus scrofa
Source: PubMed Central journal article supplement (PMC4328033; doi:10.1186/s12862-014-0269-x), 2015-02-04

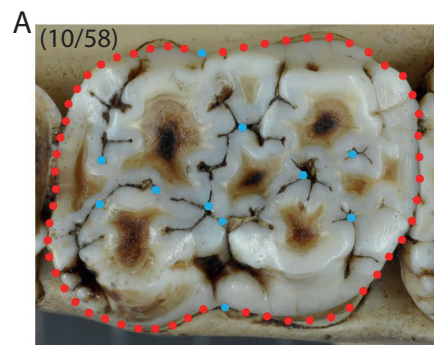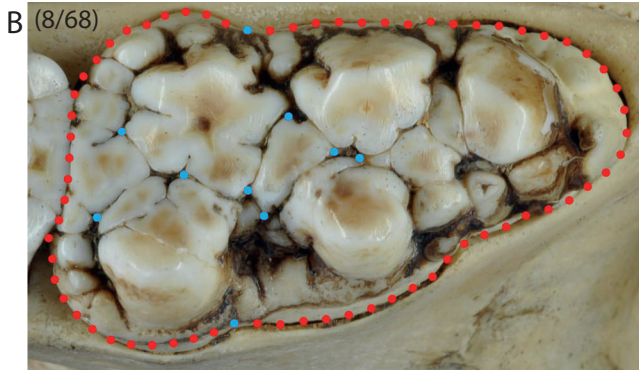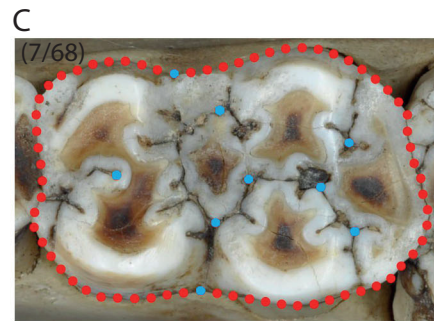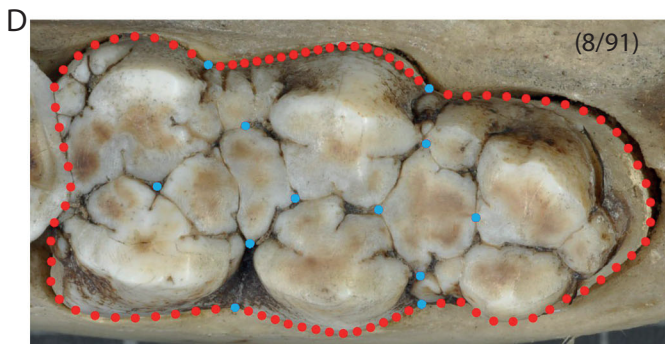

Supplement: 12862_2014_269_MOESM1_ESM.pdf [file 12862_2014_269_MOESM1_ESM.pdf]
